# Supplementary material
Source: MDPI journal article supplement (https://www.mdpi.com/2076-3298/9/7/78)
Supplement: s1 [file s1]

## Article

# Chemical Stabilization Used to Reduce Geogenic Selenium, Molybdenum, Sulfates and Fluorides Mobility in Rocks and Soils from the Parisian Basin

Maxime Brandely <sup>1,\*</sup>, Samuel Coussy <sup>2,\*</sup>, Denise Blanc-Biscarat <sup>1</sup>, Remy Gourdon <sup>1</sup> and Gaëtan Blanck <sup>3</sup>

<sup>1</sup> INSA Lyon, DEEP, EA7429, Lyon University, 69621 Villeurbanne, France;

denise.blanc-biscarat@insa-lyon.fr (D.B.-B.); remy.gourdon@insa-lyon.fr (R.G.)

<sup>2</sup> Bureau de Recherches Géologiques et Minières (BRGM), 3 av. C. Guillemin, BP 36009, CEDEX 2, 45060 Orléans, France

<sup>3</sup> Bouygues Travaux Publics, 1 Avenue Eugène Freyssinet, 78280 Guyancourt, France; g.blanck@bouygues-construction.com

\* Correspondence: maxime.brandely@insa-lyon.fr (M.B.); s.coussy@brgm.fr (S.C.)

Correspondence: MB – maxime.brandely@insa-lyon.fr ; SC – s.coussy@brgm.fr

## Supplementary Materials

**Table S1.** Results of standardized leaching tests (NF EN 12457-2) carried out on CS using various stabilizing agents. Dosing refers to the mass percentage of stabilizing agent per mass of dry excavated material. F, SO<sub>4</sub><sup>2-</sup>, Mo and Se concentrations were measured in the leachates as long as pH. The curing time refers to the time interval left between stabilization mix and leaching tests.

| Stabilizing agent              | Dosing | Trial Number | pH   | Fluorides (mg/kg) | Sulfates (mg/kg) | Mo (mg/kg) | Se (mg/kg) | Curing time |
|--------------------------------|--------|--------------|------|-------------------|------------------|------------|------------|-------------|
| Al(OH) <sub>3</sub>            | 1 %    | Rep-1        | 9.1  | <5                | 765              | 3.56       | 0.037      | 5 days      |
| Al(OH) <sub>3</sub>            | 1 %    | Rep-2        | 8.2  | 7.44              | 1120             | 4.52       | 0.022      | 5 days      |
| Al(OH) <sub>3</sub>            | 2 %    | Rep-1        | 8.2  | <5                | 647              | 3.01       | 0.032      | 5 days      |
| Al(OH) <sub>3</sub>            | 2 %    | Rep-2        | 8.2  | 5.61              | 941              | 3.14       | 0.052      | 5 days      |
| Al(OH) <sub>3</sub>            | 3 %    | Rep-1        | 8.4  | 5.02              | 676              | 2.81       | 0.023      | 5 days      |
| Al(OH) <sub>3</sub>            | 3 %    | Rep-2        | 8.2  | 5.09              | 791              | 2.38       | 0.044      | 5 days      |
| Al(OH) <sub>3</sub>            | 3 %    | Rep-3        | 8.2  | 10.4              | 786              | 1.37       | 0.1        | 5 days      |
| Al(OH) <sub>3</sub>            | 3 %    | Rep-4        | 9.5  | 11.7              | 757              | 3.25       | 0.12       | 5 days      |
| CSA                            | 2 %    | Rep-1        | 9.7  | <5                | 3300             | 4.08       | 0.11       | 5 days      |
| CSA                            | 2 %    | Rep-2        | 9.2  | <5                | 2920             | 4.05       | 0.2        | 5 days      |
| CSA                            | 2 %    | Rep-3        | 9.2  | <5                | 4520             | 4.49       | 0.16       | 5 days      |
| CSA                            | 2 %    | Rep-4        | 9.5  | <5                | 3020             | 4.54       | 0.19       | 5 days      |
| CSA                            | 4 %    | Rep-1        | 9.6  | <5                | 3480             | 4          | 0.079      | 5 days      |
| CSA                            | 4 %    | Rep-2        | 10.6 | <5                | 2340             | 3.92       | 0.16       | 5 days      |
| CSA                            | 4 %    | Rep-3        | 10.2 | <5                | 2830             | 4.11       | 0.14       | 5 days      |
| Fe <sub>3</sub> O <sub>4</sub> | 1 %    | Rep-1        | 8.2  | 11.6              | 847              | 3.596      | 0.14       | 5 days      |
| Fe <sub>3</sub> O <sub>4</sub> | 1 %    | Rep-2        | 8.4  | 12.2              | 811              | 4.89       | 0.11       | 5 days      |
| Fe <sub>3</sub> O <sub>4</sub> | 2 %    | Rep-1        | 8.2  | 12.1              | 1190             | 3.87       | 0.12       | 5 days      |
| Fe <sub>3</sub> O <sub>4</sub> | 2 %    | Rep-2        | 8.1  | 12                | 986              | 3.57       | 0.12       | 5 days      |
| Fe <sub>3</sub> O <sub>4</sub> | 3 %    | Rep-1        | 8.6  | 11.3              | 831              | 3.15       | 0.11       | 5 days      |
| Fe <sub>3</sub> O <sub>4</sub> | 3 %    | Rep-2        | 8.8  | 12.7              | 1010             | 3.82       | 0.13       | 5 days      |
| Fe <sub>2</sub> O <sub>3</sub> | 1 %    | Rep-1        | 8.1  | 12.6              | 956              | 3.82       | 0.14       | 5 days      |
| Fe <sub>2</sub> O <sub>3</sub> | 1 %    | Rep-2        | 8.3  | 12.3              | 973              | 3.94       | 0.14       | 5 days      |
| Fe <sub>2</sub> O <sub>3</sub> | 2 %    | Rep-2        | 8    | 11.7              | 944              | 2.97       | 0.11       | 5 days      |

|                                |     |       |      |             |              |              |             |        |
|--------------------------------|-----|-------|------|-------------|--------------|--------------|-------------|--------|
| Fe <sub>2</sub> O <sub>3</sub> | 2 % | Rep-1 | 8.3  | <b>12.1</b> | <b>1120</b>  | <b>3.18</b>  | <b>0.11</b> | 5 days |
| Fe <sub>2</sub> O <sub>3</sub> | 3 % | Rep-1 | 8.6  | <b>11.9</b> | 925          | <b>2.81</b>  | <b>0.12</b> | 5 days |
| Fe <sub>2</sub> O <sub>3</sub> | 3 % | Rep-2 | 8.2  | <b>11.5</b> | 868          | <b>2.71</b>  | <b>0.13</b> | 5 days |
| FeSO <sub>4</sub>              | 1 % | Rep-1 | 7.7  | 9.64        | <b>4390</b>  | <b>1.26</b>  | 0.038       | 5 days |
| FeSO <sub>4</sub>              | 1 % | Rep-2 | 7.8  | <b>11.3</b> | <b>3240</b>  | <b>1.57</b>  | 0.059       | 5 days |
| FeSO <sub>4</sub>              | 1 % | Rep-3 | 7.9  | <b>11.2</b> | <b>2810</b>  | <b>1.51</b>  | <b>0.11</b> | 5 days |
| FeSO <sub>4</sub>              | 2 % | Rep-1 | 7.9  | <b>11.6</b> | <b>7050</b>  | <b>0.806</b> | 0.04        | 5 days |
| FeSO <sub>4</sub>              | 2 % | Rep-2 | 7.6  | <b>11.6</b> | <b>6730</b>  | <b>0.857</b> | 0.043       | 5 days |
| FeSO <sub>4</sub>              | 3 % | Rep-1 | 7.9  | <b>11.6</b> | <b>10900</b> | 0.339        | 0.027       | 5 days |
| FeSO <sub>4</sub>              | 3 % | Rep-2 | 7.8  | <b>12.9</b> | <b>10500</b> | 0.428        | 0.037       | 5 days |
| PC/CaO                         | 1 % | Rep-1 | 10.3 | <b>12.9</b> | <b>1310</b>  | <b>4.73</b>  | <b>0.17</b> | 5 days |
| PC/CaO                         | 4 % | Rep-1 | 12.3 | 8.58        | 222          | <b>3.61</b>  | 0.045       | 5 days |
| PC/CaO                         | 4 % | Rep-2 | 12.2 | 6.49        | 68.5         | <b>3.59</b>  | 0.04        | 5 days |
| PC/CaO                         | 4 % | Rep-3 | 12   | 9.12        | 438          | <b>3.72</b>  | 0.06        | 5 days |
| PC/CaO                         | 4 % | Rep-4 | 12.2 | <b>10</b>   | 260          | <b>3.96</b>  | 0.061       | 5 days |
| PC/CaO                         | 4 % | Rep-5 | 11.6 | 9.27        | 637          | <b>3.68</b>  | 0.095       | 5 days |
| PC/CaO                         | 4 % | Rep-6 | 11.3 | <b>10.7</b> | <b>1010</b>  | <b>4.104</b> | <b>0.1</b>  | 5 days |
| PC/CaO                         | 4 % | Rep-7 | 11.1 | <b>12.6</b> | <b>1310</b>  | <b>3.91</b>  | <b>0.11</b> | 5 days |
| PC/CaO                         | 4 % | Rep-8 | 11.7 | <b>11.7</b> | 731          | <b>4.02</b>  | 0.087       | 5 days |
| Lime                           | 1 % | Rep-1 | 11.3 | <b>12.2</b> | 576          | <b>5.79</b>  | <b>0.19</b> | 5 days |
| Lime                           | 1 % | Rep-2 | 10.2 | <b>16.2</b> | <b>1240</b>  | <b>5.87</b>  | <b>0.26</b> | 5 days |
| Lime                           | 4 % | Rep-1 | 12.6 | 6.88        | 50.2         | <b>3.42</b>  | 0.067       | 5 days |
| Lime                           | 4 % | Rep-2 | 12.6 | 7.08        | 144          | <b>3.82</b>  | 0.07        | 5 days |
| MnO(OH)                        | 1 % | Rep-1 | 8.4  | <b>11.1</b> | <b>1070</b>  | <b>3.03</b>  | <b>0.12</b> | 5 days |
| MnO(OH)                        | 1 % | Rep-2 | 8.3  | <b>10.8</b> | 982          | <b>2.73</b>  | 0.059       | 5 days |
| MnO(OH)                        | 2 % | Rep-1 | 8.4  | <b>11.9</b> | <b>1010</b>  | <b>2.53</b>  | 0.1         | 5 days |
| MnO(OH)                        | 2 % | Rep-2 | 7.9  | <b>12.1</b> | 805          | <b>2.47</b>  | 0.036       | 5 days |
| MnO(OH)                        | 3 % | Rep-1 | 8.4  | <b>13</b>   | 958          | <b>2.08</b>  | 0.041       | 5 days |
| MnO(OH)                        | 3 % | Rep-2 | 8.3  | <b>11.8</b> | <b>1080</b>  | <b>2.11</b>  | 0.033       | 5 days |
| MnO(OH)                        | 4 % | Rep-1 | 7.9  | <b>10.9</b> | 926          | <b>2.25</b>  | 0.039       | 5 days |
| ZVI                            | 1 % | Rep-1 | 8.8  | 9.72        | 878          | <b>0.506</b> | 0.026       | 5 days |
| ZVI                            | 1 % | Rep-2 | 8.5  | 8.99        | 869          | 0.276        | 0.028       | 5 days |
| ZVI                            | 1 % | Rep-3 | 8.4  | 9.96        | <b>1040</b>  | 0.409        | 0.046       | 5 days |
| ZVI                            | 1 % | Rep-4 | 8.6  | <b>10.3</b> | <b>1120</b>  | 0.488        | 0.052       | 5 days |
| ZVI                            | 1 % | Rep-5 | 8.2  | <b>10.6</b> | 902          | 0.396        | 0.048       | 5 days |
| ZVI                            | 1 % | Rep-6 | 7.9  | <b>10.6</b> | 926          | 0.432        | 0.039       | 5 days |
| ZVI                            | 1 % | Rep-7 | 8.1  | <b>11.6</b> | 943          | <b>0.537</b> | 0.016       | 5 days |
| ZVI                            | 2 % | Rep-1 | 8    | 8.39        | <b>1120</b>  | 0.308        | 0.017       | 5 days |
| ZVI                            | 2 % | Rep-2 | 9.5  | 9.78        | 753          | <b>0.6</b>   | 0.033       | 5 days |
| ZVI                            | 2 % | Rep-3 | 7.7  | <b>10</b>   | 995          | 0.446        | 0.023       | 5 days |
| ZVI                            | 2 % | Rep-4 | 8    | <b>10.3</b> | 732          | <b>0.586</b> | 0.014       | 5 days |
| ZVI                            | 3 % | Rep-1 | 8.4  | 7.87        | 860          | 0.287        | < 0.01      | 5 days |
| ZVI                            | 3 % | Rep-2 | 7.8  | 9.24        | 856          | 0.319        | 0.017       | 5 days |
| ZVI                            | 3 % | Rep-3 | 8.8  | <b>12.7</b> | 992          | <b>0.671</b> | < 0.01      | 5 days |
| ZVI                            | 3 % | Rep-4 | 8.6  | 9.06        | 995          | 0.28         | 0.014       | 5 days |

**Table S2.** Results of standardized leaching tests (NF EN 12457-2) carried out on LS using various stabilizing agents. Dosing refers to the mass percentage of stabilizing agent per mass of dry excavated material. F-,  $\text{SO}_4^{2-}$ , Mo and Se concentrations were measured in the leachates as long as pH. The curing time refers to the time interval left between stabilization mix and leaching tests.

| Stabilizing agent        | Dose | Trial Number | pH   | Fluorides (mg/kg) | Sulfates (mg/kg) | Mo (mg/kg) | Se (mg/kg)  | Curing time |
|--------------------------|------|--------------|------|-------------------|------------------|------------|-------------|-------------|
| $\text{Al}(\text{OH})_3$ | 1 %  | Rep-1        | 8.3  | <b>38.4</b>       | 458              | 0.068      | <b>1.2</b>  | 5 days      |
| $\text{Al}(\text{OH})_3$ | 1 %  | Rep-2        | 8.3  | <b>35.9</b>       | 431              | 0.065      | <b>1.2</b>  | 5 days      |
| $\text{Al}(\text{OH})_3$ | 3 %  | Rep-1        | 8.3  | <b>36.5</b>       | 339              | 0.074      | <b>1.2</b>  | 5 days      |
| $\text{Al}(\text{OH})_3$ | 3 %  | Rep-2        | 8.4  | <b>37.5</b>       | 406              | 0.069      | <b>1.4</b>  | 5 days      |
| $\text{Fe}_3\text{O}_4$  | 1 %  | Rep-1        | 9.2  | <b>37.8</b>       | 609              | 0.068      | <b>1.4</b>  | 5 days      |
| $\text{Fe}_3\text{O}_4$  | 1 %  | Rep-2        | 8.3  | <b>38.1</b>       | 414              | 0.05       | <b>1.2</b>  | 5 days      |
| $\text{Fe}_3\text{O}_4$  | 3 %  | Rep-1        | 8.9  | <b>44.9</b>       | 382              | 0.067      | <b>1.1</b>  | 5 days      |
| $\text{Fe}_3\text{O}_4$  | 3 %  | Rep-2        | 8.4  | <b>38.1</b>       | 373              | 0.057      | <b>1.3</b>  | 5 days      |
| $\text{Fe}_2\text{O}_3$  | 1 %  | Rep-1        | 8.5  | <b>40.8</b>       | 338              | 0.071      | <b>1.1</b>  | 5 days      |
| $\text{Fe}_2\text{O}_3$  | 1 %  | Rep-2        | 8.4  | <b>39</b>         | 384              | 0.062      | <b>1.4</b>  | 5 days      |
| $\text{Fe}_2\text{O}_3$  | 3 %  | Rep-1        | 8.3  | <b>41.4</b>       | 410              | 0.066      | <b>1.8</b>  | 5 days      |
| $\text{Fe}_2\text{O}_3$  | 3 %  | Rep-2        | 8.6  | <b>37.3</b>       | 323              | 0.045      | <b>1.4</b>  | 5 days      |
| $\text{MnO}(\text{OH})$  | 1 %  | Rep-1        | 8.2  | <b>39.9</b>       | 406              | 0.064      | <b>1.5</b>  | 5 days      |
| $\text{MnO}(\text{OH})$  | 1 %  | Rep-2        | 8.2  | <b>36.7</b>       | 399              | 0.051      | <b>1.7</b>  | 5 days      |
| $\text{MnO}(\text{OH})$  | 3 %  | Rep-1        | 8.4  | <b>32.9</b>       | 404              | 0.072      | <b>1.7</b>  | 5 days      |
| $\text{MnO}(\text{OH})$  | 3 %  | Rep-2        | 8    | <b>36.3</b>       | 387              | 0.055      | <b>1.6</b>  | 5 days      |
| ZVI                      | 1 %  | Rep-1        | 8.7  | <b>43.5</b>       | 417              | < 0.01     | <b>0.43</b> | 5 days      |
| ZVI                      | 1 %  | Rep-2        | 8.2  | <b>38.8</b>       | 507              | 0.011      | <b>0.41</b> | 5 days      |
| ZVI                      | 3 %  | Rep-1        | 8.1  | <b>33.6</b>       | 248              | < 0.01     | 0.035       | 5 days      |
| ZVI                      | 3 %  | Rep-2        | 8.6  | <b>32.7</b>       | 391              | < 0.01     | 0.077       | 5 days      |
| $\text{FeSO}_4$          | 1 %  | Rep-1        | 7.9  | <b>22.1</b>       | <b>3490</b>      | 0.03       | <b>0.51</b> | 5 days      |
| $\text{FeSO}_4$          | 1 %  | Rep-2        | 8    | <b>23.6</b>       | <b>3500</b>      | 0.035      | <b>0.52</b> | 5 days      |
| $\text{FeSO}_4$          | 3 %  | Rep-1        | 7.8  | <b>15</b>         | <b>16000</b>     | < 0.01     | <b>1</b>    | 5 days      |
| $\text{FeSO}_4$          | 3 %  | Rep-2        | 8.4  | <b>18.4</b>       | <b>8200</b>      | < 0.01     | <b>0.75</b> | 5 days      |
| Lime                     | 2 %  | Rep-1        | 11.1 | <b>50.3</b>       | 310              | 0.084      | <b>1.9</b>  | 5 days      |
| Lime                     | 2 %  | Rep-2        | 11.4 | <b>43.5</b>       | 382              | 0.107      | <b>2.4</b>  | 5 days      |
| Lime                     | 4 %  | Rep-1        | 12.2 | <b>20.1</b>       | 98               | 0.055      | <b>0.99</b> | 5 days      |
| Lime                     | 4 %  | Rep-2        | 12.2 | <b>16.9</b>       | 72               | 0.059      | <b>1</b>    | 5 days      |
| PC/CaO                   | 2 %  | Rep-1        | 10.2 | <b>48.9</b>       | 494              | 0.063      | <b>2.2</b>  | 5 days      |
| PC/CaO                   | 2 %  | Rep-2        | 9.9  | <b>47.5</b>       | 737              | 0.107      | <b>1.9</b>  | 5 days      |
| PC/CaO                   | 2 %  | Rep-3        | 10.8 | <b>46.6</b>       | 667              | 0.062      | <b>2.4</b>  | 5 days      |
| PC/CaO                   | 2 %  | Rep-4        | 11.1 | <b>42.7</b>       | 899              | 0.106      | <b>1.5</b>  | 5 days      |
| PC/CaO                   | 2 %  | Rep-5        | 10.7 | <b>53.3</b>       | 716              | 0.085      | <b>2.3</b>  | 5 days      |
| PC/CaO                   | 4 %  | Rep-1        | 11.4 | <b>34.4</b>       | 875              | 0.152      | <b>1.7</b>  | 5 days      |
| PC/CaO                   | 4 %  | Rep-2        | 11.2 | <b>41.9</b>       | 572              | 0.086      | <b>1.1</b>  | 5 days      |
| PC/CaO                   | 4 %  | Rep-3        | 11.6 | <b>23.2</b>       | 655              | 0.203      | <b>1.7</b>  | 5 days      |
| PC/CaO                   | 4 %  | Rep-4        | 11.3 | <b>30</b>         | 480              | 0.112      | <b>1.2</b>  | 5 days      |
| PC/CaO                   | 4 %  | Rep-5        | 11.5 | <b>42.6</b>       | 755              | 0.117      | <b>1.9</b>  | 5 days      |
| CSA                      | 2 %  | Rep-1        | 9.6  | <b>43</b>         | <b>5800</b>      | 0.12       | <b>2.2</b>  | 5 days      |
| CSA                      | 2 %  | Rep-2        | 10.2 | <b>49.5</b>       | <b>2310</b>      | 0.177      | <b>1.7</b>  | 5 days      |
| CSA                      | 2 %  | Rep-3        | 8.7  | <b>48</b>         | <b>2660</b>      | 0.084      | <b>1</b>    | 5 days      |
| CSA                      | 2 %  | Rep-4        | 9.1  | <b>37.9</b>       | <b>1700</b>      | 0.144      | <b>1.3</b>  | 5 days      |
| CSA                      | 4 %  | Rep-1        | 10.1 | <b>37.2</b>       | <b>5560</b>      | 0.145      | <b>1.2</b>  | 5 days      |
| CSA                      | 4 %  | Rep-2        | 9.9  | <b>40.6</b>       | <b>3260</b>      | 0.365      | <b>1</b>    | 5 days      |

|     |     |       |     |             |             |       |             |        |
|-----|-----|-------|-----|-------------|-------------|-------|-------------|--------|
| CSA | 4 % | Rep-3 | 7.6 | <b>12.8</b> | <b>7570</b> | 0.253 | <b>0.14</b> | 5 days |
| CSA | 4 % | Rep-4 | 9.9 | <b>45.6</b> | <b>2670</b> | 0.219 | <b>1.2</b>  | 5 days |

**Table S3.** Results of standardized leaching tests (NF EN 12457-2) carried out on MLS-A using various stabilizing agents. Dosing refers to the mass percentage of stabilizing agent per mass of dry excavated material. F<sup>-</sup>, SO<sub>4</sub><sup>2-</sup>, Mo and Se concentrations were measured in the leachates as long as pH. The curing time refers to the time interval left between stabilization mix and leaching tests.

| Stabilizing agent              | Dose | Trial Number | pH   | Fluorides (mg/kg) | Sulfates (mg/kg) | Mo (mg/kg)   | Se (mg/kg)  | Curing time |
|--------------------------------|------|--------------|------|-------------------|------------------|--------------|-------------|-------------|
| Al(OH) <sub>3</sub>            | 1%   | Rep-1        | 7.8  | <b>12.5</b>       | <b>3550</b>      | <b>0.997</b> | 0.091       | 5 days      |
| Fe <sub>3</sub> O <sub>4</sub> | 1%   | Rep-1        | 7.9  | <b>13.7</b>       | <b>3390</b>      | <b>0.657</b> | <b>0.11</b> | 5 days      |
| Fe <sub>3</sub> O <sub>4</sub> | 1%   | Rep-2        | 7.9  | <b>14.2</b>       | <b>4250</b>      | <b>0.785</b> | <b>0.12</b> | 5 days      |
| Fe <sub>3</sub> O <sub>4</sub> | 2%   | Rep-1        | 7.8  | <b>14.8</b>       | <b>3840</b>      | <b>0.716</b> | <b>0.13</b> | 5 days      |
| Fe <sub>3</sub> O <sub>4</sub> | 2%   | Rep-2        | 7.7  | <b>14</b>         | <b>4490</b>      | <b>0.77</b>  | <b>0.13</b> | 5 days      |
| Fe <sub>2</sub> O <sub>3</sub> | 1%   | Rep-1        | 7.7  | <b>13.8</b>       | <b>4050</b>      | <b>0.617</b> | <b>0.11</b> | 5 days      |
| Fe <sub>2</sub> O <sub>3</sub> | 1%   | Rep-2        | 7.6  | <b>13.7</b>       | <b>4000</b>      | <b>0.533</b> | <b>0.12</b> | 5 days      |
| Fe <sub>2</sub> O <sub>3</sub> | 2%   | Rep-1        | 8.4  | <b>13.7</b>       | <b>3530</b>      | <b>0.567</b> | <b>0.1</b>  | 5 days      |
| Fe <sub>2</sub> O <sub>3</sub> | 2%   | Rep-2        | 7.9  | <b>12.7</b>       | <b>4200</b>      | 0.46         | <b>0.1</b>  | 5 days      |
| MnO(OH)                        | 1%   | Rep-1        | 7.9  | <b>13</b>         | <b>4350</b>      | <b>0.519</b> | <b>0.12</b> | 5 days      |
| MnO(OH)                        | 1%   | Rep-2        | 7.8  | <b>12.5</b>       | <b>4250</b>      | <b>0.488</b> | <b>0.12</b> | 5 days      |
| MnO(OH)                        | 2%   | Rep-1        | 7.8  | <b>12.8</b>       | <b>4120</b>      | <b>0.538</b> | <b>0.11</b> | 5 days      |
| MnO(OH)                        | 2%   | Rep-2        | 7.8  | <b>13.1</b>       | <b>4170</b>      | 0.372        | <b>0.12</b> | 5 days      |
| ZVI                            | 1%   | Rep-1        | 8.3  | <b>14.8</b>       | <b>3730</b>      | 0.256        | 0.017       | 5 days      |
| ZVI                            | 1%   | Rep-2        | 7.9  | <b>10.2</b>       | <b>3680</b>      | 0.07         | 0.052       | 5 days      |
| ZVI                            | 2%   | Rep-1        | 8    | 8.82              | <b>3960</b>      | 0.052        | 0.034       | 5 days      |
| ZVI                            | 3%   | Rep-1        | 8.3  | 8.24              | <b>3750</b>      | 0.063        | 0.018       | 5 days      |
| Lime                           | 2%   | Rep-1        | 12   | <b>12.6</b>       | <b>2600</b>      | <b>2</b>     | 0.07        | 5 days      |
| Lime                           | 4%   | Rep-1        | 12.7 | 9.4               | <b>2970</b>      | <b>2.01</b>  | 0.075       | 5 days      |
| PC/CaO                         | 1%   | Rep-1        | 9.6  | <b>16.3</b>       | <b>4020</b>      | <b>1.45</b>  | <b>0.15</b> | 5 days      |
| PC/CaO                         | 1%   | Rep-2        | 9.7  | <b>16.8</b>       | <b>3890</b>      | <b>2.68</b>  | <b>0.16</b> | 5 days      |

**Table S4 : Results of standardized leaching tests (NF EN 12457-2) carried out on TM using various stabilizing agents.** Dosing refers to the mass percentage of stabilizing agent per mass of dry excavated material. F,  $\text{SO}_4^{2-}$ , Mo and Se concentrations were measured in the leachates as long as pH. The curing time refers to the time interval left between stabilization mix and leaching tests.

| Stabilizing agent        | Dose | Trial Number | pH   | Fluorides (mg/kg) | Sulfates (mg/kg) | Mo (mg/kg) | Se (mg/kg) | Curing time |
|--------------------------|------|--------------|------|-------------------|------------------|------------|------------|-------------|
| $\text{Al}(\text{OH})_3$ | 1%   | Rep-1        | 12   | 9.14              | 2310             | 1.34       | < 0.01     | 5 days      |
| $\text{Al}(\text{OH})_3$ | 2%   | Rep-2        | 11.9 | 9.12              | 1810             | 1.21       | < 0.01     | 5 days      |
| $\text{Al}(\text{OH})_3$ | 3%   | Rep-3        | 12.1 | 9.54              | 1440             | 1.24       | < 0.01     | 5 days      |
| ZVI                      | 1%   | Rep-1        | 11.8 | 8.54              | 3250             | 1.4        | < 0.01     | 5 days      |
| ZVI                      | 2%   | Rep-2        | 11.8 | 8.01              | 2920             | 1.11       | < 0.01     | 5 days      |
| ZVI                      | 3%   | Rep-3        | 11.9 | 8.75              | 2580             | 1.27       | < 0.01     | 5 days      |
| Lime                     | 1%   | Rep-1        | 12.3 | 9.31              | 2240             | 1.37       | < 0.01     | 5 days      |
| Lime                     | 2%   | Rep-2        | 12.4 | 9.42              | 2100             | 1.32       | < 0.01     | 5 days      |
| Lime                     | 3%   | Rep-3        | 12.4 | 8.98              | 2280             | 1.15       | < 0.01     | 5 days      |
| PC/CaO                   | 1%   | Rep-1        | 12.2 | 9.08              | 2080             | 1.34       | < 0.01     | 5 days      |
| PC/CaO                   | 2%   | Rep-2        | 12.3 | 9.12              | 2180             | 1.304      | < 0.01     | 5 days      |
| PC/CaO                   | 3%   | Rep-3        | 12.3 | 9.29              | 2040             | 1.37       | < 0.01     | 5 days      |
| CSA                      | 3%   | Rep-1        | 11.8 | 7.43              | 1390             | 1.23       | 0.012      | 5 days      |
| CSA                      | 3%   | Rep-2        | 11.9 | 7.38              | 1570             | 1.14       | < 0.01     | 5 days      |
